# Supplementary material
Source: PubMed Central journal article supplement (PMC5061923)
Supplement: hdy201659x1.pdf [file hdy201659x1.pdf]

Supplementary figure 1. Full tree from the Bayesian analysis using Phylobayes and employing the CAT replacement model, the Birth-Death process as tree prior and multiple calibrations (Supplementary table 5, analysis 1). Numbers at each node represent mean divergence times.

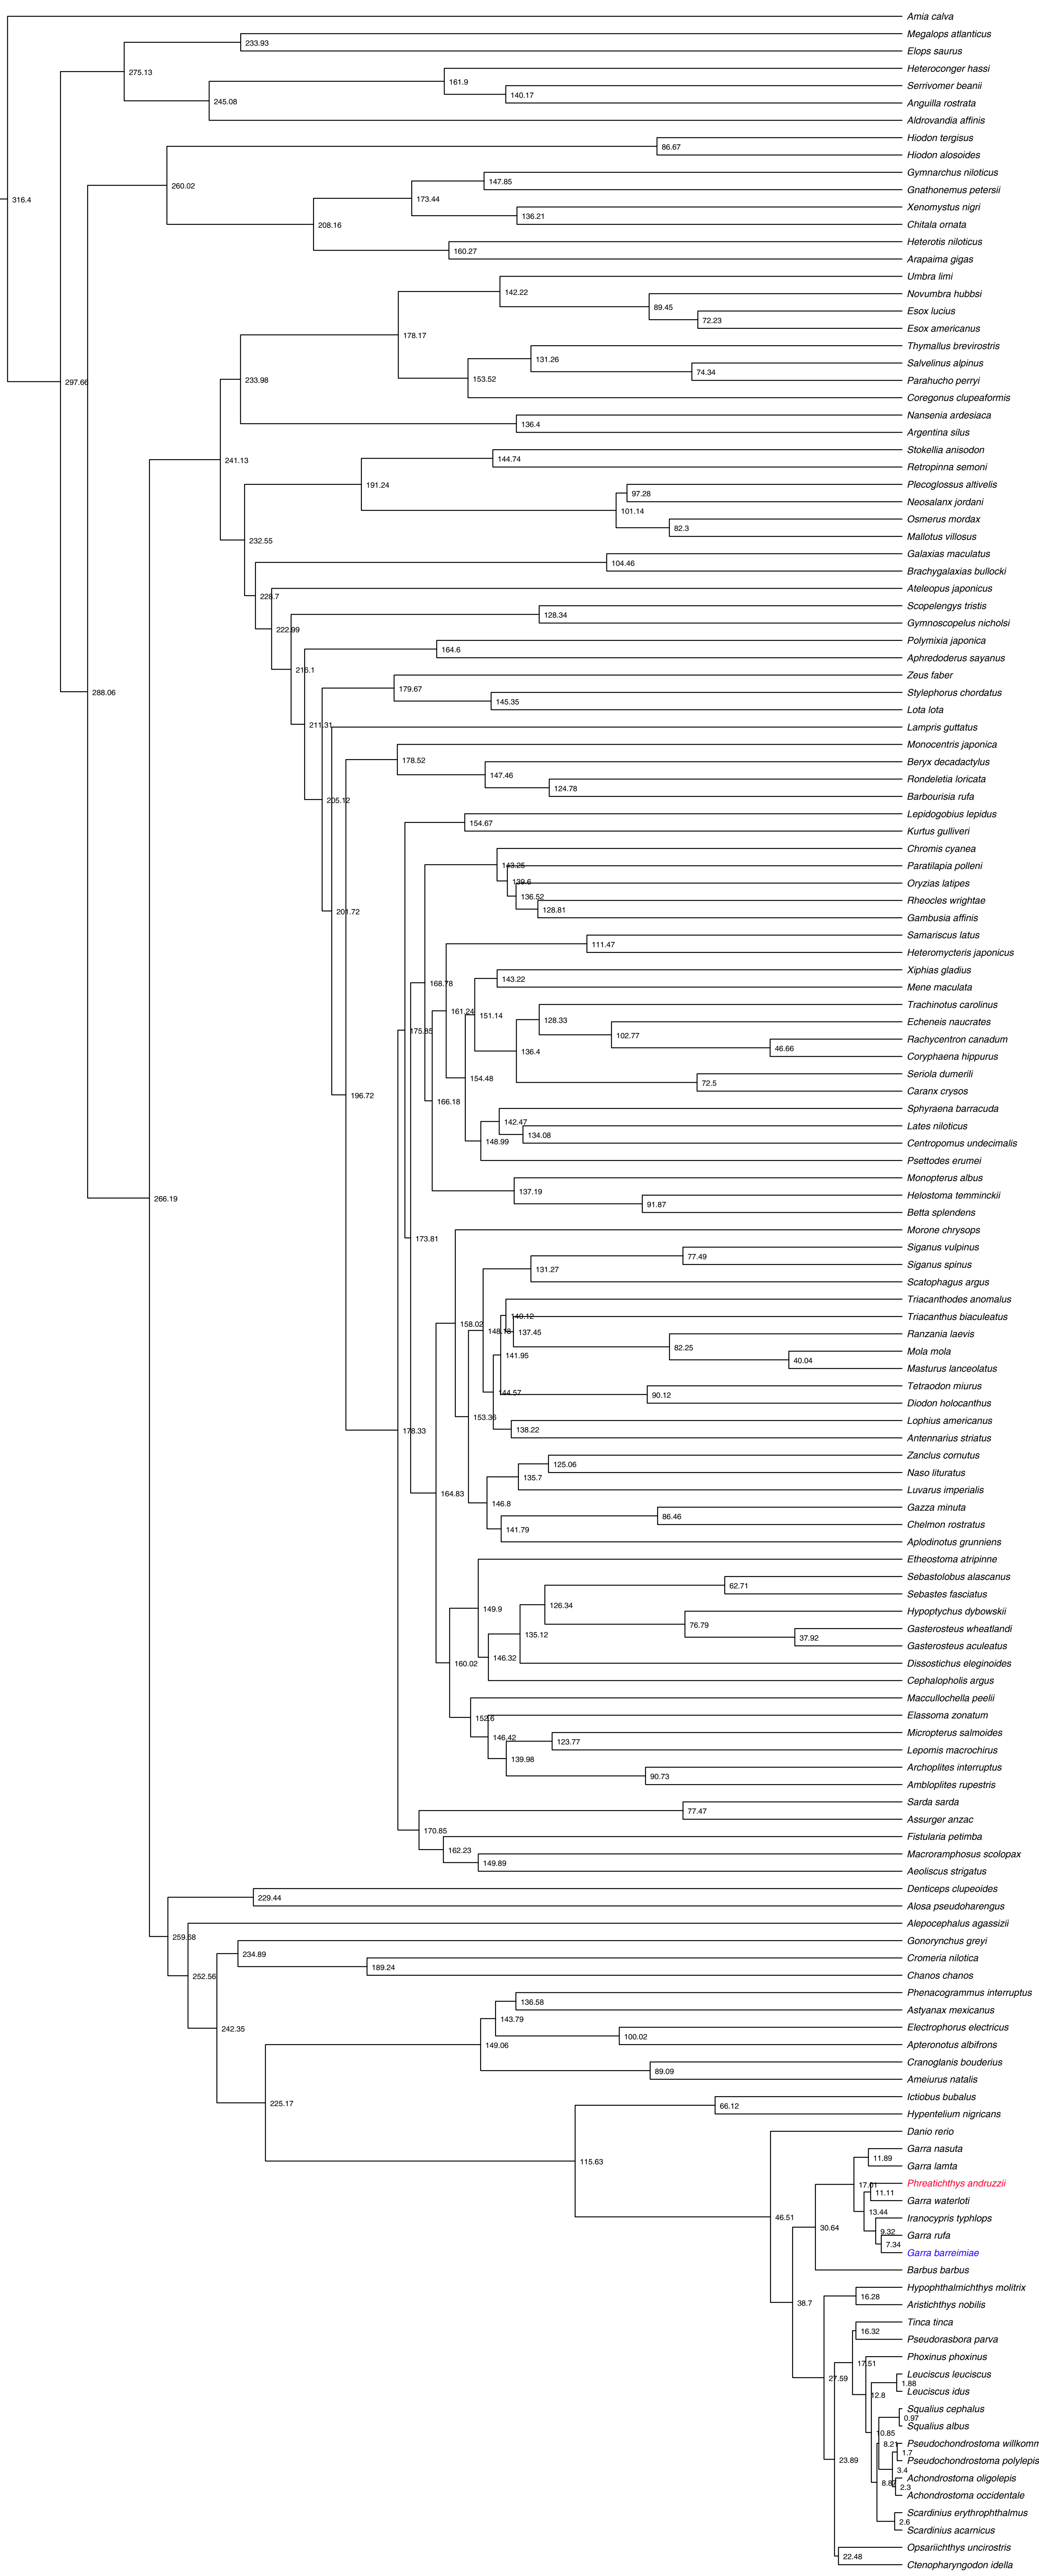

350 300 250 200 150 100 50 0
