# Supplementary material
Source: PubMed Central journal article supplement (PMC5061923)
Supplement: hdy201659x3.pdf [file hdy201659x3.pdf]

## Supplementary information

**Relaxed selective constraints drove functional modifications in peripheral photoreception of the cavefish**

***P. andruzzii* and provide insight into the time of cave colonization**

Luca Calderoni, Omar Rota-Stabelli, Elena Frigato, Alex Panziera, Sandra Kirchner, Nicholas S. Foulkes, Luise

Kruckenhauser, Cristiano Bertolucci and Silvia Fuselli

## Supplementary Tables

| <b>Supplementary Table 1.</b> Ensembl or GenBank IDs of the sequences used in the molecular evolution analysis |                                      |                              |
|----------------------------------------------------------------------------------------------------------------|--------------------------------------|------------------------------|
|                                                                                                                | <b>Melanopsin, <i>opn4m2</i></b>     | <b>Rhodopsin, <i>rho</i></b> |
| <i>Danio rerio</i>                                                                                             | ENSDARG00000007553                   | ENSDARG00000002193           |
| <i>Cyprinus carpio</i>                                                                                         | LN590693.1 (Region 5073779..5074962) | U02475.1                     |
| <i>Rutilus rutilus</i>                                                                                         | AY226847.1                           |                              |
| <i>Carassius auratus</i>                                                                                       |                                      | L11863.1                     |
| <i>Astyanax mexicanus</i>                                                                                      | XM_007229310.2                       | U12328.1                     |
| <i>Clupea harengus</i>                                                                                         | XM_012825665.1                       | XM_012826141.1               |
| <i>Ictalurus punctatus</i>                                                                                     | FJ839438.1                           |                              |
| <i>Esox lucius</i>                                                                                             | XM_010895490.1                       | XM_010902101.2               |
| <i>Plecoglossus altivelis</i>                                                                                  |                                      | AB074484.1                   |



| <b>Supplementary Table 3. Fossil constraints used in the Phylobayes analysis. Each constraint calibrates the age of the last common ancestor of the two species reported in the table.</b> |                                |                  |                           |
|--------------------------------------------------------------------------------------------------------------------------------------------------------------------------------------------|--------------------------------|------------------|---------------------------|
| <b>Species 1</b>                                                                                                                                                                           | <b>Species 2</b>               | <b>age (MYA)</b> | <b>reference</b>          |
| <i>Danio rerio</i>                                                                                                                                                                         | <i>Squalius albus</i>          | 55.8 (maximum)   | <sup>a</sup> calib. (i)   |
| <i>Tinca tinca</i>                                                                                                                                                                         | <i>Leuciscus leuciscus</i>     | 18.0 (maximum)   | <sup>a</sup> calib. (ii)  |
| <i>Hypophthalmichthys molitrix</i>                                                                                                                                                         | <i>Aristichthys nobilis</i>    | 1.81 (minimum)   | <sup>a</sup> calib. (iii) |
| <i>Chitala ornata</i>                                                                                                                                                                      | <i>Gymnarchus niloticus</i>    | 99.6 (minimum)   | <sup>b</sup> calib. (5)   |
| <i>Cromeria nilotica</i>                                                                                                                                                                   | <i>Chanos chanos</i>           | 133.9 (minimum)  | <sup>b</sup> calib. (6)   |
| <i>Ameiurus natalis</i>                                                                                                                                                                    | <i>Cranoglanis boudierus</i>   | 59.0 (minimum)   | <sup>b</sup> calib. (7)   |
| <i>Ictiobus bubalus</i>                                                                                                                                                                    | <i>Hypentelium nigricans</i>   | 49.4 (minimum)   | <sup>b</sup> calib. (8)   |
| <i>Novumbra hubbsi</i>                                                                                                                                                                     | <i>Esox americanus</i>         | 76.4 (minimum)   | <sup>b</sup> calib. (9)   |
| <i>Coregonus clupeaformis</i>                                                                                                                                                              | <i>Salvelinus alpinus</i>      | 51.8 (minimum)   | <sup>b</sup> calib. (10)  |
| <i>Aphredoderus sayanus</i>                                                                                                                                                                | <i>Polymixia japonica</i>      | 93.6 (minimum)   | <sup>b</sup> calib. (11)  |
| <i>Zeus faber</i>                                                                                                                                                                          | <i>Stylephorus chordatus</i>   | 70.6 (minimum)   | <sup>b</sup> calib. (14)  |
| <i>Monocentris japonica</i>                                                                                                                                                                | <i>Barbourisia rufa</i>        | 93.6 (minimum)   | <sup>b</sup> calib. (17)  |
| <i>Seriola dumerili</i>                                                                                                                                                                    | <i>Trachinotus carolinus</i>   | 55.8 (minimum)   | <sup>b</sup> calib. (23)  |
| <i>Echeneis naucrates</i>                                                                                                                                                                  | <i>Rachycentron canadum</i>    | 30.1 (minimum)   | <sup>b</sup> calib. (24)  |
| <i>Luvarus imperialis</i>                                                                                                                                                                  | <i>Zanclus cornutus</i>        | 55.8 (minimum)   | <sup>b</sup> calib. (25)  |
| <i>Scatophagus argus</i>                                                                                                                                                                   | <i>Siganus spinus</i>          | 55.8 (minimum)   | <sup>b</sup> calib. (26)  |
| <i>Heteromycteris japonicus</i>                                                                                                                                                            | <i>Samariscus latus</i>        | 40.4 (minimum)   | <sup>b</sup> calib. (28)  |
| <i>Chelmon rostratus</i>                                                                                                                                                                   | <i>Gazza minuta</i>            | 30.1 (minimum)   | <sup>b</sup> calib. (30)  |
| <i>Diodon holocanthus</i>                                                                                                                                                                  | <i>Tetraodon miurus</i>        | 50.0 (minimum)   | <sup>b</sup> calib. (33)  |
| <i>Ambloplites rupestris</i>                                                                                                                                                               | <i>Archoplites interruptus</i> | 15.5 (minimum)   | <sup>b</sup> calib. (36)  |
| <sup>a</sup> Wang et al. 2012                                                                                                                                                              |                                |                  |                           |
| <sup>b</sup> Near et al. 2012                                                                                                                                                              |                                |                  |                           |
| MYA: million years ago                                                                                                                                                                     |                                |                  |                           |

**Supplementary Table 4. Species, family and GenBank accession numbers of the *cytb* sequences included in the dataset analyzed with Phylobayes.**

| Species                              | Family           | GenBank ID    |
|--------------------------------------|------------------|---------------|
| <i>Phreatichthys andruzzii</i>       | Cyprinidae       | present study |
| <i>Garra barreimiae</i>              | Cyprinidae       | present study |
| <i>Garra rufa</i>                    | Cyprinidae       | AF180857.1    |
| <i>Garra waterloti</i>               | Cyprinidae       | JX074289.1    |
| <i>Garra lamta</i>                   | Cyprinidae       | JX074239.1    |
| <i>Garra nasuta</i>                  | Cyprinidae       | JX074295.1    |
| <i>Iranocypris typhlops</i>          | Cyprinidae       | KF896299.1    |
| <i>Danio rerio</i>                   | Cyprinidae       | NC_002333.2   |
| <i>Opsariichthys uncirostris</i>     | Cyprinidae       | AF308437.1    |
| <i>Tinca tinca</i>                   | Cyprinidae       | Y10451.1      |
| <i>Leuciscus leuciscus</i>           | Cyprinidae       | AY509823.1    |
| <i>Hypophthalmichthys molitrix</i>   | Cyprinidae       | AF051866.1    |
| <i>Aristichthys nobilis</i>          | Cyprinidae       | AF051855.1    |
| <i>Ctenopharyngodon idella</i>       | Cyprinidae       | AF051860.1    |
| <i>Pseudorasbora parva</i>           | Cyprinidae       | AF051873.1    |
| <i>Barbus barbus</i>                 | Cyprinidae       | Y10450.1      |
| <i>Squalius cephalus</i>             | Cyprinidae       | EU856046.1    |
| <i>Squalius albus</i>                | Cyprinidae       | AY549460.1    |
| <i>Achondrostoma occidentale</i>     | Cyprinidae       | KF529123.1    |
| <i>Achondrostoma oligolepis</i>      | Cyprinidae       | KF529120.1    |
| <i>Pseudochondrostoma willkommii</i> | Cyprinidae       | KF529129.1    |
| <i>Pseudochondrostoma polylepis</i>  | Cyprinidae       | KF529127.1    |
| <i>Scardinius acarnicus</i>          | Cyprinidae       | AF090775.1    |
| <i>Scardinius erythrophthalmus</i>   | Cyprinidae       | AY509848.1    |
| <i>Leuciscus idus</i>                | Cyprinidae       | HM560099.1    |
| <i>Phoxinus phoxinus</i>             | Cyprinidae       | Y10448.1      |
| <i>Naso lituratus</i>                | Acanthuridae     | AB276964.1    |
| <i>Oryzias latipes</i>               | Adrianichthyidae | NC_004387.1   |

|                                   |                 |             |
|-----------------------------------|-----------------|-------------|
| <i>Alepocephalus agassizii</i>    | Alepocephalidae | NC_013564.1 |
| <i>Phenacogrammus interruptus</i> | Alestidae       | AB018998.1  |
| <i>Amia calva</i>                 | Amiidae         | AB018999.1  |
| <i>Anguilla rostrata</i>          | Anguillidae     | AB021767.1  |
| <i>Antennarius striatus</i>       | Antennariidae   | AB282828.1  |
| <i>Aphredoderus sayanus</i>       | Aphredoderidae  | NC_004372.1 |
| <i>Apteronotus albifrons</i>      | Apteronotidae   | NC_004692.1 |
| <i>Heterotis niloticus</i>        | Arapaimidae     | AB035240.1  |
| <i>Arapaima gigas</i>             | Arapaimidae     | AB035241.1  |
| <i>Argentina silus</i>            | Argentinidae    | EU492323.1  |
| <i>Ateleopus japonicus</i>        | Ateleopodidae   | NC_003178.1 |
| <i>Barbourisia rufa</i>           | Barbourisiidae  | NC_012046.1 |
| <i>Rheocles wrightae</i>          | Bedotiidae      | KC133646.1  |
| <i>Beryx decadactylus</i>         | Berycidae       | DQ197929.1  |
| <i>Caranx crysos</i>              | Carangidae      | EF392575.1  |
| <i>Seriola dumerili</i>           | Carangidae      | EU036499.1  |
| <i>Trachinotus carolinus</i>      | Carangidae      | NC_024184.1 |
| <i>Hypentelium nigricans</i>      | Catostomidae    | AF454909.1  |
| <i>Ictiobus bubalus</i>           | Catostomidae    | JF799443.1  |
| <i>Micropterus salmoides</i>      | Centrarchidae   | AF479273.1  |
| <i>Lepomis macrochirus</i>        | Centrarchidae   | NC_015984.2 |
| <i>Ambloplites rupestris</i>      | Centrarchidae   | AY115978.1  |
| <i>Archoplites interruptus</i>    | Centrarchidae   | AY225665.1  |
| <i>Macroramphosus scolopax</i>    | Centriscidae    | NC_010265.1 |
| <i>Aeoliscus strigatus</i>        | Centriscidae    | NC_010270.1 |
| <i>Centropomus undecimalis</i>    | Centropomidae   | AF240739.1  |
| <i>Chelmon rostratus</i>          | Chaetodontidae  | NC_025953.1 |
| <i>Chanos chanos</i>              | Chanidae        | NC_004693.1 |
| <i>Astyanax mexicanus</i>         | Characidae      | FJ439346.1  |
| <i>Paratilapia polleni</i>        | Cichlidae       | NC_011170.1 |
| <i>Alosa pseudoharengus</i>       | Clupeidae       | NC_009576.1 |

|                                 |                 |             |
|---------------------------------|-----------------|-------------|
| <i>Heteroconger hassi</i>       | Congridae       | NC_013629.1 |
| <i>Coryphaena hippurus</i>      | Coryphaenidae   | DQ197936.1  |
| <i>Cranoglanis boudierius</i>   | Cranoglanididae | NC_008280.1 |
| <i>Denticeps clupeioides</i>    | Denticiptidae   | NC_007889.1 |
| <i>Diodon holocanthus</i>       | Diodontidae     | NC_009866.1 |
| <i>Echeneis naucrates</i>       | Echeneidae      | KF021242.1  |
| <i>Elassoma zonatum</i>         | Elassomatidae   | NC_011388.1 |
| <i>Elops saurus</i>             | Elopidae        | NC_005803.1 |
| <i>Esox lucius</i>              | Esocidae        | HM177470.1  |
| <i>Esox americanus</i>          | Esocidae        | AY497436.1  |
| <i>Fistularia petimba</i>       | Fistulariidae   | NC_024190.1 |
| <i>Brachygalaxias bullocki</i>  | Galaxiidae      | JQ697797.1  |
| <i>Galaxias maculatus</i>       | Galaxiidae      | NC_004594.1 |
| <i>Gasterosteus aculeatus</i>   | Gasterosteidae  | NC_003174.1 |
| <i>Gasterosteus wheatlandi</i>  | Gasterosteidae  | NC_011570.1 |
| <i>Lepidogobius lepidus</i>     | Gobiidae        | KF415602.1  |
| <i>Gonorynchus greyi</i>        | Gonorynchidae   | NC_004702.1 |
| <i>Gymnarchus niloticus</i>     | Gymnarchidae    | NC_012707.1 |
| <i>Electrophorus electricus</i> | Gymnotidae      | AP011978.1  |
| <i>Aldrovandia affinis</i>      | Halosauridae    | NC_005801.1 |
| <i>Helostoma temminckii</i>     | Helostomatidae  | NC_022728.1 |
| <i>Hiodon alosoides</i>         | Hiodontidae     | NC_005145.1 |
| <i>Hiodon tergisus</i>          | Hiodontidae     | NC_015082.1 |
| <i>Hypoptychus dybowskii</i>    | Hypoptychidae   | NC_004400.1 |
| <i>Ameiurus natalis</i>         | Ictaluridae     | AF484158.1  |
| <i>Cromeria nilotica</i>        | Kneriidae       | AP011560.1  |
| <i>Kurtus gulliveri</i>         | Kurtidae        | NC_022477.1 |
| <i>Lampris guttatus</i>         | Lampridae       | JF931966.1  |
| <i>Lates niloticus</i>          | Latidae         | AB117106.1  |
| <i>Gazza minuta</i>             | Leiognathidae   | NC_026232.1 |
| <i>Lophius americanus</i>       | Lophiidae       | NC_004380.1 |

|                                 |                 |             |
|---------------------------------|-----------------|-------------|
| <i>Lota lota</i>                | Lotidae         | DQ174052.1  |
| <i>Luvarus imperialis</i>       | Luvaridae       | NC_009851.1 |
| <i>Megalops atlanticus</i>      | Megalopidae     | NC_005804.1 |
| <i>Mene maculata</i>            | Menidae         | AB355909.1  |
| <i>Nansenia ardesiaca</i>       | Microstomatidae | NC_004596.1 |
| <i>Ranzania laevis</i>          | Molidae         | NC_007887.1 |
| <i>Masturus lanceolatus</i>     | Molidae         | NC_005837.1 |
| <i>Mola mola</i>                | Molidae         | NC_005836.1 |
| <i>Monocentris japonica</i>     | Monocentridae   | NC_004392.1 |
| <i>Gnathonemus petersii</i>     | Mormyridae      | NC_012717.2 |
| <i>Morone chrysops</i>          | Moronidae       | AF240745.1  |
| <i>Gymnoscopelus nicholsi</i>   | Myctophidae     | AP012250.1  |
| <i>Serrivomer beanii</i>        | Nemichthyidae   | NC_013627.1 |
| <i>Scopelogys tristis</i>       | Neoscopelidae   | AP012228.1  |
| <i>Xenomystus nigri</i>         | Notopteridae    | NC_012715.1 |
| <i>Chitala ornata</i>           | Notopteridae    | AB035243.1  |
| <i>Dissostichus eleginoides</i> | Nototheniidae   | NC_018135.1 |
| <i>Mallotus villosus</i>        | Osmeridae       | NC_015244.1 |
| <i>Osmerus mordax</i>           | Osmeridae       | AB114911.1  |
| <i>Betta splendens</i>          | Osphronemidae   | AB571120.1  |
| <i>Maccullochella peelii</i>    | Percichthyidae  | AP014532.1  |
| <i>Etheostoma atripinne</i>     | Percidae        | AF288444.1  |
| <i>Plecoglossus altivelis</i>   | Plecoglossidae  | NC_002734.2 |
| <i>Gambusia affinis</i>         | Poeciliidae     | NC_004388.1 |
| <i>Polymixia japonica</i>       | Polymixiidae    | NC_002648.1 |
| <i>Chromis cyanea</i>           | Pomacentridae   | AY208529.1  |
| <i>Psettodes erumei</i>         | Psettodidae     | NC_020032.1 |
| <i>Rachycentron canadum</i>     | Rachycentridae  | AB292793.1  |
| <i>Stokellia anisodon</i>       | Retropinnidae   | JN232590.1  |
| <i>Retropinna semoni</i>        | Retropinnidae   | JN232588.1  |
| <i>Rondeletia loricata</i>      | Rondeletiidae   | NC_003186.1 |

|                                 |                 |             |
|---------------------------------|-----------------|-------------|
| <i>Neosalanx jordani</i>        | Salangidae      | EU656132.1  |
| <i>Coregonus clupeaformis</i>   | Salmonidae      | JX960776.1  |
| <i>Thymallus brevirostris</i>   | Salmonidae      | JX960865.1  |
| <i>Salvelinus alpinus</i>       | Salmonidae      | JX960845.1  |
| <i>Parahucho perryi</i>         | Salmonidae      | JX262005.1  |
| <i>Samariscus latus</i>         | Samaridae       | NC_024263.1 |
| <i>Scatophagus argus</i>        | Scatophagidae   | KF361860.1  |
| <i>Aplodinotus grunniens</i>    | Sciaenidae      | AY225662.1  |
| <i>Sarda sarda</i>              | Scombridae      | EU036483.1  |
| <i>Sebastolobus alascanus</i>   | Sebastidae      | DQ678500.1  |
| <i>Sebastes fasciatus</i>       | Sebastidae      | DQ678444.1  |
| <i>Cephalopholis argus</i>      | Serranidae      | NC_022142.1 |
| <i>Siganus vulpinus</i>         | Siganidae       | NC_025588.1 |
| <i>Siganus spinus</i>           | Siganidae       | AB276821.1  |
| <i>Heteromycteris japonicus</i> | Soleidae        | NC_024921.1 |
| <i>Sphyræna barracuda</i>       | Sphyrænidae     | NC_022484.1 |
| <i>Stylephorus chordatus</i>    | Stylephoridae   | NC_009948.1 |
| <i>Monopterus albus</i>         | Synbranchidae   | NC_003192.1 |
| <i>Tetraodon miurus</i>         | Tetraodontidae  | NC_015361.1 |
| <i>Triacanthus biaculeatus</i>  | Triacanthidae   | NC_009863.1 |
| <i>Triacanthodes anomalus</i>   | Triacanthodidae | NC_009861.1 |
| <i>Assurger anzac</i>           | Trichiuridae    | NC_022494.1 |
| <i>Umbra limi</i>               | Umbridae        | AY497458.1  |
| <i>Novumbra hubbsi</i>          | Umbridae        | NC_022455.1 |
| <i>Xiphias gladius</i>          | Xiphiidae       | DQ198018.1  |
| <i>Zanclus cornutus</i>         | Zanclidae       | NC_009852.1 |
| <i>Zeus faber</i>               | Zeidae          | DQ198019.1  |

**Supplementary Table 5.** Divergence time estimation between *P. andrussii* and *G. barreimiae* using Phylobayes (mean and 95% HPD).

|                               |                          |
|-------------------------------|--------------------------|
| 1 - CAT model and Birth Death | 13.4 MYA (7.4-21.3 MYA)  |
| 2 - GTR model and Birth Death | 14.2 MYA (8.4-20.8 MYA)  |
| 3 - CAT model and Uniform     | 17.6 MYA (10.6-26.7 MYA) |

**Supplementary Table 6.** Predicted phenotypic effect of species-specific amino acid changes of opn4m2 (A) and rho (B) observed comparing the cyprinid species used for the analysis of natural selection (see Figure 1A and 1B). The predicted effect of the amino acid changes common to the two cavefish is also shown. Grey background: portion of the gene 3' of the premature stop codon.

| a) opn4m2, melanopsin          |           |           |                          |                    |                          |                          |                    |
|--------------------------------|-----------|-----------|--------------------------|--------------------|--------------------------|--------------------------|--------------------|
|                                | Aminoacid | Aminoacid | PANTHER                  | SIFT database      |                          |                          |                    |
|                                | position  | change    | P <sub>deleterious</sub> | UniRef90           | UniProt-SwissProt        | UniProt-TrEMBL           | overall            |
| <i>Phreatichthys andruzzii</i> | 69        | S > F     | <b>0.55</b>              | tolerated          | tolerated                | tolerated                | tolerated          |
|                                | 162       | R > C     | <b>1.00</b>              | <b>deleterious</b> | <b>deleterious</b>       | <b>deleterious</b>       | <b>deleterious</b> |
|                                | 202       | G > D     | <b>0.93</b>              | <b>deleterious</b> | <b>deleterious</b>       | <b>deleterious</b>       | <b>deleterious</b> |
|                                | 205       | A > V     | 0.29                     | <b>deleterious</b> | tolerated                | <b>deleterious</b>       | mild               |
|                                | 285       | A > P     | <b>0.94</b>              | <b>deleterious</b> | <b>deleterious</b>       | <b>deleterious</b>       | <b>deleterious</b> |
|                                | 343       | T > K     | 0.42                     | <b>deleterious</b> | <b>deleterious</b>       | <b>deleterious</b>       | <b>deleterious</b> |
| <i>Garra barreimiae</i>        | 36        | H > R     | NA                       | tolerated          | deleterious <sup>a</sup> | deleterious <sup>a</sup> | mild               |
|                                | 304       | V > M     | 0.24                     | <b>deleterious</b> | <b>deleterious</b>       | <b>deleterious</b>       | <b>deleterious</b> |
| shared by                      | 22        | G > S     | NA                       | tolerated          | deleterious <sup>a</sup> | deleterious <sup>a</sup> | mild               |
| <i>P. andruzzii</i>            | 39        | V > I     | NA                       | tolerated          | tolerated                | tolerated                | tolerated          |
| and                            | 175       | R > Q     | 0.18                     | tolerated          | tolerated                | tolerated                | tolerated          |
| <i>G. barreimiae</i>           | 188       | V > L     | 0.35                     | tolerated          | tolerated                | tolerated                | tolerated          |
|                                | 313       | Y > F     | 0.27                     | <b>deleterious</b> | tolerated                | tolerated                | tolerated          |
|                                | 349       | V > T     | 0.17                     | tolerated          | tolerated                | tolerated                | tolerated          |
| <i>Cyprinus carpio</i>         | 21        | A > T     | NA                       | tolerated          | tolerated                | deleterious <sup>a</sup> | tolerated          |
|                                | 136       | P > S     | 0.14                     | tolerated          | tolerated                | tolerated                | tolerated          |
|                                | 160       | A > C     | 0.33                     | <b>deleterious</b> | <b>deleterious</b>       | <b>deleterious</b>       | <b>deleterious</b> |
|                                | 171       | A > T     | 0.26                     | tolerated          | <b>deleterious</b>       | <b>deleterious</b>       | mild               |
|                                | 183       | A > V     | 0.10                     | tolerated          | tolerated                | tolerated                | tolerated          |
|                                | 224       | P > S     | 0.34                     | tolerated          | tolerated                | tolerated                | tolerated          |
|                                | 360       | P > L     | 0.08                     | tolerated          | tolerated                | tolerated                | tolerated          |
|                                | 376       | G > S     | 0.09                     | tolerated          | tolerated                | tolerated                | tolerated          |
| <i>Rutilus rutilus</i>         | 17        | I > N     | NA                       | tolerated          | deleterious <sup>a</sup> | deleterious <sup>a</sup> | mild               |
|                                | 30        | R > K     | NA                       | tolerated          | tolerated                | tolerated                | tolerated          |
|                                | 69        | S > A     | 0.16                     | tolerated          | tolerated                | tolerated                | tolerated          |
|                                | 131       | V > I     | 0.09                     | tolerated          | tolerated                | tolerated                | tolerated          |
|                                | 136       | P > I     | 0.39                     | <b>deleterious</b> | tolerated                | tolerated                | tolerated          |
|                                | 175       | R > N     | 0.20                     | tolerated          | tolerated                | tolerated                | tolerated          |
|                                | 246       | G > V     | 0.12                     | tolerated          | tolerated                | tolerated                | tolerated          |
|                                | 250       | F > V     | 0.08                     | tolerated          | tolerated                | tolerated                | tolerated          |

|                                |                    |                  |                                  |                    |                    |                          |                    |
|--------------------------------|--------------------|------------------|----------------------------------|--------------------|--------------------|--------------------------|--------------------|
|                                | 259                | A > M            | 0.45                             | <b>deleterious</b> | <b>deleterious</b> | <b>deleterious</b>       | <b>deleterious</b> |
|                                | 272                | H > Q            | NA                               | tolerated          | tolerated          | tolerated                | tolerated          |
|                                | 287                | V > I            | 0.09                             | tolerated          | tolerated          | tolerated                | tolerated          |
|                                | 360                | P > T            | 0.08                             | tolerated          | tolerated          | tolerated                | tolerated          |
|                                | 368                | D > E            | 0.10                             | tolerated          | tolerated          | tolerated                | tolerated          |
|                                | 386                | T > S            | 0.11                             | tolerated          | tolerated          | tolerated                | tolerated          |
|                                | 408                | T > K            | NA                               | tolerated          | tolerated          | <b>deleterious</b>       | tolerated          |
| <i>Danio rerio</i>             |                    |                  |                                  |                    |                    |                          |                    |
|                                | 49                 | E > D            | 0.05                             | tolerated          | tolerated          | tolerated                | tolerated          |
|                                | 86                 | I > V            | 0.10                             | tolerated          | tolerated          | tolerated                | tolerated          |
|                                | 103                | V > I            | 0.22                             | tolerated          | tolerated          | tolerated                | tolerated          |
|                                | 112                | F > L            | 0.29                             | tolerated          | tolerated          | tolerated                | tolerated          |
|                                | 115                | L > V            | 0.12                             | tolerated          | tolerated          | tolerated                | tolerated          |
|                                | 174                | G > S            | 0.12                             | tolerated          | tolerated          | <b>deleterious</b>       | tolerated          |
|                                | 186                | A > V            | 0.14                             | tolerated          | tolerated          | tolerated                | tolerated          |
|                                | 235                | I > V            | 0.13                             | tolerated          | tolerated          | tolerated                | tolerated          |
|                                | 251                | G > A            | 0.27                             | tolerated          | tolerated          | tolerated                | tolerated          |
|                                | 255                | A > T            | 0.21                             | tolerated          | tolerated          | tolerated                | tolerated          |
|                                | 290                | L > V            | 0.10                             | tolerated          | tolerated          | tolerated                | tolerated          |
|                                | 296                | V > I            | 0.14                             | tolerated          | tolerated          | tolerated                | tolerated          |
|                                | 316                | L > F            | 0.09                             | tolerated          | tolerated          | tolerated                | tolerated          |
|                                | 395                | I > M            | NA                               | tolerated          | tolerated          | tolerated                | tolerated          |
| b) rhodopsin                   |                    |                  |                                  |                    |                    |                          |                    |
|                                | Aminoacid position | Aminoacid change | PANTHER P <sub>deleterious</sub> | SIFT database      |                    |                          |                    |
|                                |                    |                  |                                  | UniRef90           | UniProt-SwissProt  | UniProt-TrEMBL           |                    |
| <i>Phreatichthys andruzzii</i> | 107                | R > H            | 0.21                             | tolerated          | tolerated          | tolerated                | tolerated          |
|                                | 137                | M > T            | 0.17                             | <b>deleterious</b> | <b>deleterious</b> | deleterious <sup>a</sup> | <b>deleterious</b> |
|                                | 158                | A > T            | 0.28                             | <b>deleterious</b> | <b>deleterious</b> | deleterious <sup>a</sup> | <b>deleterious</b> |
|                                | 248                | R > C            | <b>0.71</b>                      | <b>deleterious</b> | <b>deleterious</b> | deleterious <sup>a</sup> | <b>deleterious</b> |
|                                | 271                | V > M            | <b>0.57</b>                      | tolerated          | tolerated          | deleterious <sup>a</sup> | mild               |
|                                | 287                | F > C            | <b>0.83</b>                      | <b>deleterious</b> | <b>deleterious</b> | deleterious <sup>a</sup> | <b>deleterious</b> |
|                                | 304                | C > F            | 0.11                             | <b>deleterious</b> | <b>deleterious</b> | deleterious <sup>a</sup> | <b>deleterious</b> |
|                                | 311                | K > R            | 0.13                             | tolerated          | tolerated          | tolerated                | tolerated          |
| <i>Garra barreimiae</i>        |                    |                  |                                  |                    |                    |                          |                    |
|                                | 281                | S > T            | 0.22                             | tolerated          | tolerated          | tolerated                | tolerated          |
| shared by                      |                    |                  |                                  |                    |                    |                          |                    |
|                                | 8                  | A > N            | 0.13                             | tolerated          | tolerated          | tolerated                | tolerated          |
| <i>P. andruzzii</i>            | 22                 | S > D            | NA                               | tolerated          | tolerated          | deleterious <sup>a</sup> | tolerated          |
| and                            | 49                 | I > L            | 0.08                             | tolerated          | tolerated          | tolerated                | tolerated          |
| <i>G. barreimiae</i>           | 263                | I > V            | 0.09                             | tolerated          | tolerated          | tolerated                | tolerated          |
|                                | 266                | L > V            | 0.08                             | tolerated          | tolerated          | tolerated                | tolerated          |
|                                | 278                | H > N            | 0.13                             | tolerated          | tolerated          | tolerated                | tolerated          |

|                                                                                                                                |     |       |             |                    |                    |                          |                    |
|--------------------------------------------------------------------------------------------------------------------------------|-----|-------|-------------|--------------------|--------------------|--------------------------|--------------------|
| <i>Cyprinus carpio</i>                                                                                                         | 21  | R > K | NA          | tolerated          | tolerated          | deleterious <sup>a</sup> | tolerated          |
|                                                                                                                                | 54  | V > I | 0.08        | tolerated          | tolerated          | tolerated                | tolerated          |
|                                                                                                                                | 108 | L > I | 0.13        | tolerated          | tolerated          | tolerated                | tolerated          |
|                                                                                                                                | 209 | I > L | 0.16        | tolerated          | tolerated          | tolerated                | tolerated          |
|                                                                                                                                | 232 | E > D | 0.23        | tolerated          | tolerated          | tolerated                | tolerated          |
|                                                                                                                                | 297 | T > S | 0.14        | tolerated          | tolerated          | tolerated                | tolerated          |
| <i>Carassius auratus</i>                                                                                                       | 7   | P > D | 0.36        | tolerated          | tolerated          | tolerated                | tolerated          |
|                                                                                                                                | 108 | L > V | 0.12        | tolerated          | tolerated          | tolerated                | tolerated          |
|                                                                                                                                | 112 | L > P | <b>0.73</b> | <b>deleterious</b> | <b>deleterious</b> | deleterious <sup>a</sup> | <b>deleterious</b> |
|                                                                                                                                | 195 | T > P | NA          | tolerated          | tolerated          | deleterious <sup>a</sup> | tolerated          |
|                                                                                                                                | 196 | P > Q | 0.14        | tolerated          | tolerated          | deleterious <sup>a</sup> | tolerated          |
|                                                                                                                                | 197 | G > A | 0.14        | tolerated          | tolerated          | deleterious <sup>a</sup> | tolerated          |
|                                                                                                                                | 237 | Q > H | <b>0.97</b> | <b>deleterious</b> | <b>deleterious</b> | deleterious <sup>a</sup> | <b>deleterious</b> |
|                                                                                                                                | 238 | Q > E | <b>0.55</b> | tolerated          | <b>deleterious</b> | tolerated                | mild               |
| <i>Danio rerio</i>                                                                                                             | 39  | C > L | 0.49        | tolerated          | tolerated          | tolerated                | tolerated          |
|                                                                                                                                | 82  | S > A | 0.47        | tolerated          | tolerated          | tolerated                | tolerated          |
|                                                                                                                                | 133 | F > I | 0.49        | tolerated          | tolerated          | tolerated                | tolerated          |
|                                                                                                                                | 198 | Y > V | 0.54        | tolerated          | tolerated          | tolerated                | tolerated          |
|                                                                                                                                | 213 | I > F | 0.08        | tolerated          | tolerated          | tolerated                | tolerated          |
|                                                                                                                                | 260 | G > A | 0.30        | tolerated          | tolerated          | tolerated                | tolerated          |
|                                                                                                                                | 270 | S > G | 0.12        | tolerated          | tolerated          | tolerated                | tolerated          |
| <sup>a</sup> the prediction may be biased by the close phylogenetic relationship between the species of the multiple alignment |     |       |             |                    |                    |                          |                    |
